# Supplementary material for: In Vitro Study on the Adhesive Performance of Some Resin-Based Materials Used to Restore Class II Cavities
Source: MDPI journal article supplement (doi:10.3390/ma14154299), 2021-07-31
Supplement: s1 [file s1]

| A.Microleakage in cervical area |         |       |   |        |         |        |          |    |        |          |     |       |          |
|---------------------------------|---------|-------|---|--------|---------|--------|----------|----|--------|----------|-----|-------|----------|
| Group                           | Section | Mean  | ± | SD     | p-value |        |          |    |        |          |     |       |          |
| I                               | A1      | 679.4 | ± | 885.92 | A1      | I-II   | > 0.9999 | B1 | I-II   | 0.4683   | I   | A1-A0 | 0.625    |
|                                 | A0      | 357   | ± | 360.06 |         | I-III  | > 0.9999 |    | I-III  | 0.5238   |     | B1-B0 | 0.3125   |
|                                 | B1      | 591.8 | ± | 688.66 |         | I-IV   | 0.7857   |    | I-IV   | 0.7266   |     | A1-B1 | 0.75     |
|                                 | B0      | 851.6 | ± | 894.48 |         | I-V    | 0.6349   |    | I-V    | 0.3651   |     | A0-B0 | 0.4375   |
| II                              | A1      | 741.2 | ± | 717.23 | A1      | II-III | 0.662    | B1 | II-III | 0.3333   | II  | A1-A0 | 0.625    |
|                                 | A0      | 424.4 | ± | 636.16 |         | II-IV  | 0.7698   |    | II-IV  | 0.0994   |     | B1-B0 | 0.875    |
|                                 | B1      | 342   | ± | 253.04 |         | II-V   | 0.2259   |    | II-V   | 0.2381   |     | A1-B1 | 0.2475   |
|                                 | B0      | 430   | ± | 596.15 |         | III-IV | 0.8235   |    | III-IV | 0.0476*  |     | A0-B0 | > 0.9999 |
| III                             | A1      | 556.2 | ± | 562.43 | A0      | III-V  | 0.3382   | B0 | III-V  | 0.8413   | III | A1-A0 | 0.125    |
|                                 | A0      | 67.2  | ± | 92.41  |         | IV-V   | 0.1394   |    | IV-V   | 0.0317*  |     | B1-B0 | 0.625    |
|                                 | B1      | 210   | ± | 394.52 |         | I-II   | > 0.9999 |    | I-II   | 0.3333   |     | A1-B1 | 0.125    |
|                                 | B0      | 429.8 | ± | 353.62 |         | I-III  | 0.2857   |    | I-III  | 0.746    |     | A0-B0 | 0.125    |
| IV                              | A1      | 628.6 | ± | 420.73 | A0      | I-IV   | 0.958    | B0 | I-IV   | 0.4127   | IV  | A1-A0 | 0.1245   |
|                                 | A0      | 345.4 | ± | 313.4  |         | I-V    | 0.6419   |    | I-V    | 0.3016   |     | B1-B0 | 0.0625   |
|                                 | B1      | 718.8 | ± | 374.72 |         | II-III | 0.6825   |    | II-III | 0.8571   |     | A1-B1 | 0.4969   |
|                                 | B0      | 322.6 | ± | 398.63 |         | II-IV  | 0.6825   |    | II-IV  | > 0.9999 |     | A0-B0 | 0.8125   |
| V                               | A1      | 281.8 | ± | 69.31  | A0      | II-V   | 0.5397   | B0 | II-V   | > 0.9999 | V   | A1-A0 | 0.293    |
|                                 | A0      | 470.8 | ± | 384.21 |         | III-IV | 0.1764   |    | III-IV | 0.6905   |     | B1-B0 | 0.25     |
|                                 | B1      | 133.2 | ± | 197.74 |         | III-V  | 0.0476*  |    | III-V  | 0.2765   |     | A1-B1 | 0.3125   |
|                                 | B0      | 208.2 | ± | 224.18 |         | IV-V   | 0.5872   |    | IV-V   | 0.8254   |     | A0-B0 | 0.3364   |
| B.Microleakage in occlusal area |         |       |   |        |         |        |          |    |        |          |     |       |          |
| Group                           | Section | Mean  | ± | SD     | p-value |        |          |    |        |          |     |       |          |
| I                               | A1      | 342.6 | ± | 422.58 | A1      | I-II   | 0.7315   | B1 | I-II   | 0.4444   | I   | A1-A0 | 0.125    |
|                                 | A0      | 46.4  | ± | 103.75 |         | I-III  | 0.1667   |    | I-III  | 0.4444   |     | B1-B0 | > 0.9999 |
|                                 | B1      | 0.00  | ± | 0.00   |         | I-IV   | > 0.9999 |    | I-IV   | 0.1474   |     | A1-B1 | 0.1441   |
|                                 | B0      | 81    | ± | 181.12 |         | I-V    | 0.4475   |    | I-V    | 0.0476*  |     | A0-B0 | > 0.9999 |
| II                              | A1      | 264.4 | ± | 252.1  | A1      | II-III | 0.5238   | B1 | II-III | 0.8413   | II  | A1-A0 | 0.8815   |
|                                 | A0      | 281.6 | ± | 226.73 |         | II-IV  | 0.8254   |    | II-IV  | 0.5238   |     | B1-B0 | 0.5      |
|                                 | B1      | 100.8 | ± | 162.02 |         | II-V   | 0.254    |    | II-V   | 0.1746   |     | A1-B1 | 0.25     |
|                                 | B0      | 21.6  | ± | 48.3   |         | III-IV | 0.5238   |    | III-IV | 0.5238   |     | A0-B0 | 0.125    |
| III                             | A1      | 123.2 | ± | 275.48 | A0      | III-V  | 0.127    | B0 | III-V  | 0.3333   | III | A1-A0 | > 0.9999 |
|                                 | A0      | 40.2  | ± | 89.89  |         | IV-V   | 0.3016   |    | IV-V   | 0.7186   |     | B1-B0 | > 0.9999 |
|                                 | B1      | 167.8 | ± | 278.87 |         | I-II   | 0.0873   |    | I-II   | > 0.9999 |     | A1-B1 | 0.5      |
|                                 | B0      | 207.4 | ± | 289.1  |         | I-III  | > 0.9999 |    | I-III  | 0.4444   |     | A0-B0 | 0.5      |
| IV                              | A1      | 260.6 | ± | 243.46 | A0      | I-IV   | > 0.9999 | B0 | I-IV   | 0.2857   | IV  | A1-A0 | 0.5      |
|                                 | A0      | 125.6 | ± | 280.85 |         | I-V    | 0.2857   |    | I-V    | 0.7222   |     | B1-B0 | 0.7874   |
|                                 | B1      | 291.2 | ± | 363.11 |         | II-III | 0.0873   |    | II-III | 0.4444   |     | A1-B1 | > 0.9999 |
|                                 | B0      | 330   | ± | 367.13 |         | II-IV  | 0.2857   |    | II-IV  | 0.1667   |     | A0-B0 | 0.25     |
| V                               | A1      | 581.8 | ± | 519.55 | A0      | II-V   | 0.6905   | B0 | II-V   | 0.4444   | V   | A1-A0 | 0.125    |
|                                 | A0      | 262   | ± | 369.02 |         | III-IV | > 0.9999 |    | III-IV | 0.5238   |     | B1-B0 | 0.375    |
|                                 | B1      | 379.6 | ± | 385.3  |         | III-V  | 0.2857   |    | III-V  | 0.6825   |     | A1-B1 | 0.428    |
|                                 | B0      |       |   |        |         |        |          |    |        |          |     |       |          |

| Group | Section | Mean   | ± | SD     | <i>p-value</i> |        |          |    |        |          |     |       |          |
|-------|---------|--------|---|--------|----------------|--------|----------|----|--------|----------|-----|-------|----------|
| I     | A1      | 3017.4 | ± | 313.65 | A1             | I-II   | 0.4375   | B1 | I-II   | 0.0362   | I   | A1-A0 | 0.625    |
|       | A0      | 2769.8 | ± | 474.53 |                | I-III  | 0.3347   |    | I-III  | 0.0958   |     | B1-B0 | 0.8529   |
|       | B1      | 3079.6 | ± | 342.64 |                | I-IV   | 0.6048   |    | I-IV   | 0.5714   |     | A1-B1 | 0.8529   |
|       | B0      | 3132.4 | ± | 493.46 |                | I-V    | 0.0667   |    | I-V    | 0.0652   |     | A0-B0 | 0.3125   |
| II    | A1      | 2798.6 | ± | 320.9  | A1             | II-III | 0.8413   | B1 | II-III | 0.5405   | II  | A1-A0 | > 0.9999 |
|       | A0      | 2825.4 | ± | 348.82 |                | II-IV  | > 0.9999 |    | II-IV  | 0.4595   |     | B1-B0 | 0.8469   |
|       | B1      | 2643   | ± | 182.97 |                | II-V   | 0.125    |    | II-V   | 0.0012** |     | A1-B1 | 0.1875   |
|       | B0      | 2584   | ± | 603.96 |                | III-IV | 0.8547   |    | III-IV | 0.3146   |     | A0-B0 | 0.5361   |
| III   | A1      | 2760.2 | ± | 464.22 | A0             | III-V  | 0.0285*  | B0 | III-V  | 0.0119*  | III | A1-A0 | 0.4756   |
|       | A0      | 2933.8 | ± | 270.48 |                | IV-V   | 0.0852   |    | IV-V   | 0.0767   |     | B1-B0 | 0.3227   |
|       | B1      | 2433.6 | ± | 684.4  |                | I-II   | 0.8413   |    | I-II   | 0.1545   |     | A1-B1 | 0.0319*  |
|       | B0      | 2665.6 | ± | 372.43 |                | I-III  | 0.8413   |    | I-III  | 0.1298   |     | A0-B0 | 0.1295   |
| IV    | A1      | 2831.6 | ± | 704.71 | A0             | I-IV   | > 0.9999 | B0 | I-IV   | 0.0556   | IV  | A1-A0 | 0.3903   |
|       | A0      | 3010.4 | ± | 696.32 |                | I-V    | 0.0317*  |    | I-V    | 0.9022   |     | B1-B0 | 0.1875   |
|       | B1      | 2886   | ± | 648.62 |                | II-III | 0.5979   |    | II-III | 0.8036   |     | A1-B1 | 0.8439   |
|       | B0      | 2604.2 | ± | 402.66 |                | II-IV  | 0.6097   |    | II-IV  | > 0.9999 |     | A0-B0 | 0.0625   |
| V     | A1      | 3614   | ± | 545.14 | A0             | II-V   | 0.0266*  | B0 | II-V   | 0.1556   | V   | A1-A0 | 0.0956   |
|       | A0      | 3510.6 | ± | 444.43 |                | III-IV | 0.8244   |    | III-IV | 0.8125   |     | B1-B0 | 0.0958   |
|       | B1      | 3570   | ± | 382.43 |                | III-V  | 0.0382*  |    | III-V  | 0.1208   |     | A1-B1 | 0.7951   |
|       | B0      | 3096   | ± | 410.66 |                | IV-V   | 0.2127   |    | IV-V   | 0.2222   |     | A0-B0 | 0.1577   |

#### D. Microleakage ratio in cervical area

| Group | Section | Mean | ± | SD   | <i>p-value</i> |        |          |    |        |          |     |       |          |
|-------|---------|------|---|------|----------------|--------|----------|----|--------|----------|-----|-------|----------|
| I     | A1      | 0.23 | ± | 0.3  | A1             | I-II   | 0.8333   | B1 | I-II   | 0.5844   | I   | A1-A0 | > 0.9999 |
|       | A0      | 0.15 | ± | 0.18 |                | I-III  | 0.8333   |    | I-III  | 0.5238   |     | B1-B0 | 0.5617   |
|       | B1      | 0.2  | ± | 0.25 |                | I-IV   | 0.6349   |    | I-IV   | 0.5864   |     | A1-B1 | 0.75     |
|       | B0      | 0.24 | ± | 0.24 |                | I-V    | 0.6349   |    | I-V    | 0.2857   |     | A0-B0 | 0.5952   |
| II    | A1      | 0.28 | ± | 0.27 | A1             | II-III | 0.6753   | B1 | II-III | 0.3333   | II  | A1-A0 | 0.625    |
|       | A0      | 0.14 | ± | 0.21 |                | II-IV  | 0.9452   |    | II-IV  | 0.1644   |     | B1-B0 | 0.875    |
|       | B1      | 0.13 | ± | 0.1  |                | II-V   | 0.1774   |    | II-V   | 0.4032   |     | A1-B1 | 0.2537   |
|       | B0      | 0.16 | ± | 0.23 |                | III-IV | 0.7081   |    | III-IV | 0.0952   |     | A0-B0 | > 0.9999 |
| III   | A1      | 0.21 | ± | 0.21 | A0             | III-V  | 0.2263   | B0 | III-V  | 0.8413   | III | A1-A0 | 0.125    |
|       | A0      | 0.02 | ± | 0.03 |                | IV-V   | 0.1551   |    | IV-V   | 0.0159*  |     | B1-B0 | 0.625    |
|       | B1      | 0.09 | ± | 0.16 |                | I-II   | > 0.9999 |    | I-II   | 0.3333   |     | A1-B1 | 0.125    |
|       | B0      | 0.17 | ± | 0.14 |                | I-III  | 0.2857   |    | I-III  | 0.5699   |     | A0-B0 | 0.125    |
| IV    | A1      | 0.27 | ± | 0.24 | A0             | I-IV   | 0.8186   | B0 | I-IV   | 0.4127   | IV  | A1-A0 | 0.1571   |
|       | A0      | 0.13 | ± | 0.12 |                | I-V    | 0.8927   |    | I-V    | 0.1645   |     | B1-B0 | 0.125    |
|       | B1      | 0.28 | ± | 0.2  |                | II-III | 0.6825   |    | II-III | 0.6825   |     | A1-B1 | 0.8976   |
|       | B0      | 0.13 | ± | 0.17 |                | II-IV  | 0.5556   |    | II-IV  | > 0.9999 |     | A0-B0 | > 0.9999 |
| V     | A1      | 0.08 | ± | 0.02 | A0             | II-V   | 0.5397   | B0 | II-V   | > 0.9999 | V   | A1-A0 | 0.2602   |
|       | A0      | 0.14 | ± | 0.11 |                | III-IV | 0.1746   |    | III-IV | 0.6905   |     | B1-B0 | 0.25     |
|       | B1      | 0.03 | ± | 0.05 |                | III-V  | 0.0952   |    | III-V  | 0.1647   |     | A1-B1 | 0.1875   |
|       | B0      | 0.06 | ± | 0.07 |                | IV-V   | 0.898    |    | IV-V   | 0.8254   |     | A0-B0 | 0.3654   |

#### E. Microleakage ration at occlusal area

| Group | Section | Mean | ± | SD   | <i>p-value</i> |        |        |    |        |         |    |       |          |
|-------|---------|------|---|------|----------------|--------|--------|----|--------|---------|----|-------|----------|
| I     | A1      | 0.11 | ± | 0.13 | A1             | I-II   | 0.1667 | B1 | I-II   | 0.4444  | I  | A1-A0 | 0.125    |
|       | A0      | 0.02 | ± | 0.05 |                | I-III  | 0.9231 |    | I-III  | 0.4444  |    | B1-B0 | > 0.9999 |
|       | B1      | 0.00 | ± | 0.00 |                | I-IV   | 0.9232 |    | I-IV   | 0.1432  |    | A1-B1 | 0.1271   |
|       | B0      | 0.02 | ± | 0.05 |                | I-V    | 0.6641 |    | I-V    | 0.0476* |    | A0-B0 | > 0.9999 |
| II    | A1      | 0.09 | ± | 0.09 |                | II-III | 0.5238 |    | II-III | 0.8413  | II | A1-A0 | 0.7137   |

|     |    |      |   |      |    |        |          |    |        |          |     |       |          |
|-----|----|------|---|------|----|--------|----------|----|--------|----------|-----|-------|----------|
|     | A0 | 0.11 | ± | 0.1  |    | II-IV  | 0.8425   |    | II-IV  | 0.5238   |     | B1-B0 | 0.5      |
|     | B1 | 0.04 | ± | 0.06 |    | II-V   | 0.4093   |    | II-V   | 0.3333   |     | A1-B1 | 0.25     |
|     | B0 | 0.01 | ± | 0.02 |    | III-IV | 0.4048   |    | III-IV | 0.5238   |     | A0-B0 | 0.125    |
| III | A1 | 0.05 | ± | 0.1  |    | III-V  | 0.1667   |    | III-V  | 0.3333   | III | A1-A0 | > 0.9999 |
|     | A0 | 0.01 | ± | 0.03 |    | IV-V   | 0.5685   |    | IV-V   | 0.9309   |     | B1-B0 | > 0.9999 |
|     | B1 | 0.07 | ± | 0.11 |    | I-II   | 0.127    |    | I-II   | > 0.9999 |     | A1-B1 | 0.5      |
|     | B0 | 0.08 | ± | 0.11 |    | I-III  | > 0.9999 |    | I-III  | 0.4444   | IV  | A0-B0 | 0.5      |
|     | A1 | 0.11 | ± | 0.11 |    | I-IV   | > 0.9999 |    | I-IV   | 0.5      |     | A1-A0 | 0.25     |
|     | A0 | 0.05 | ± | 0.12 |    | I-V    | 0.4048   |    | I-V    | 0.7222   |     | B1-B0 | 0.644    |
| IV  | B1 | 0.11 | ± | 0.14 | A0 | II-III | 0.0873   | B0 | II-III | 0.4444   | V   | A1-B1 | 0.8746   |
|     | B0 | 0.14 | ± | 0.16 |    | II-IV  | 0.2857   |    | II-IV  | 0.1667   |     | A0-B0 | 0.25     |
|     | A1 | 0.15 | ± | 0.12 |    | II-V   | 0.5226   |    | II-V   | 0.4444   |     | A1-A0 | 0.0428*  |
| V   | A0 | 0.07 | ± | 0.09 |    | III-IV | > 0.9999 |    | III-IV | 0.5238   |     | B1-B0 | 0.375    |
|     | B1 | 0.11 | ± | 0.1  |    | III-V  | 0.2857   |    | III-V  | 0.6825   |     | A1-B1 | 0.4638   |
|     | B0 | 0.04 | ± | 0.06 |    | IV-V   | 0.5238   |    | IV-V   | 0.5238   |     | A0-B0 | 0.75     |

\*p<0.05; \*\*p<0.01; \*\*\*p<0.001. A1, B1= part of the sections containing enamel-located restorations; A0, B0= part of the sections containing cementum-located restorations.
